# Supplementary material
Source: Springer Nature journal article supplement (https://www.springermedizin.de/resource/supplementary/12936_2006_271_MOESM2_ESM.pdf/9547356)

(a)

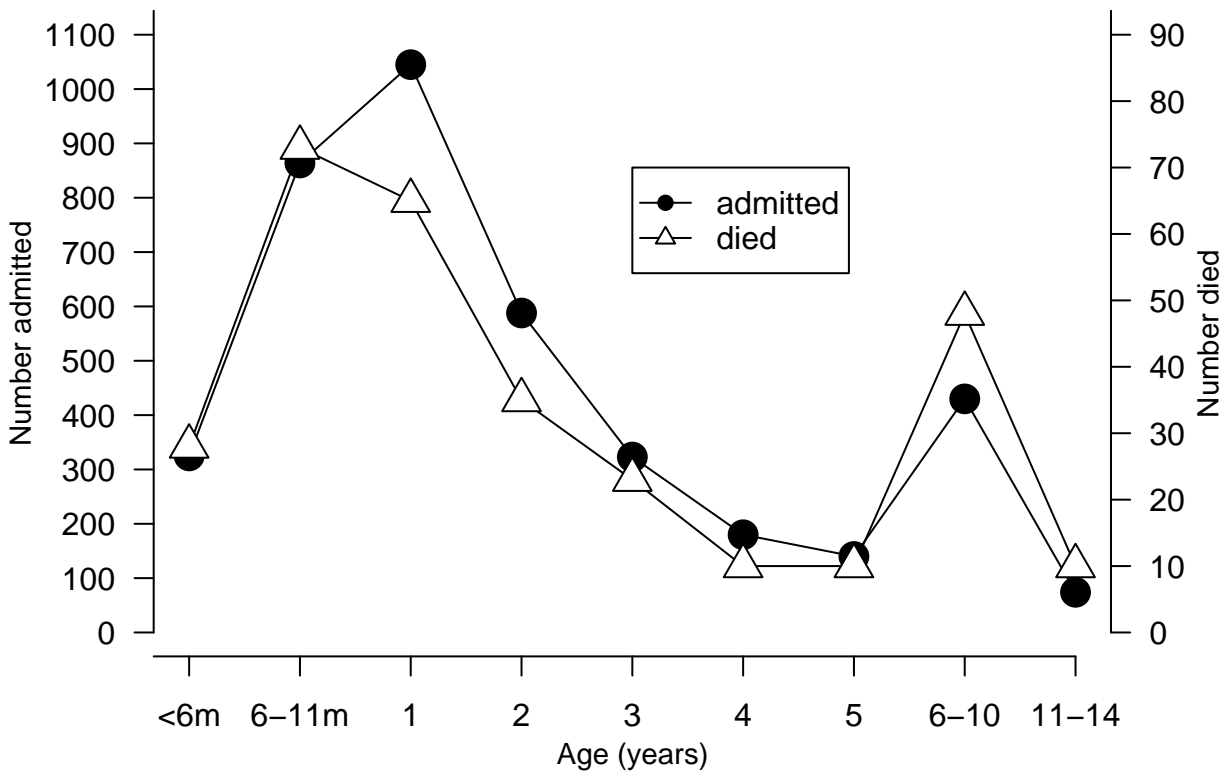

(b)

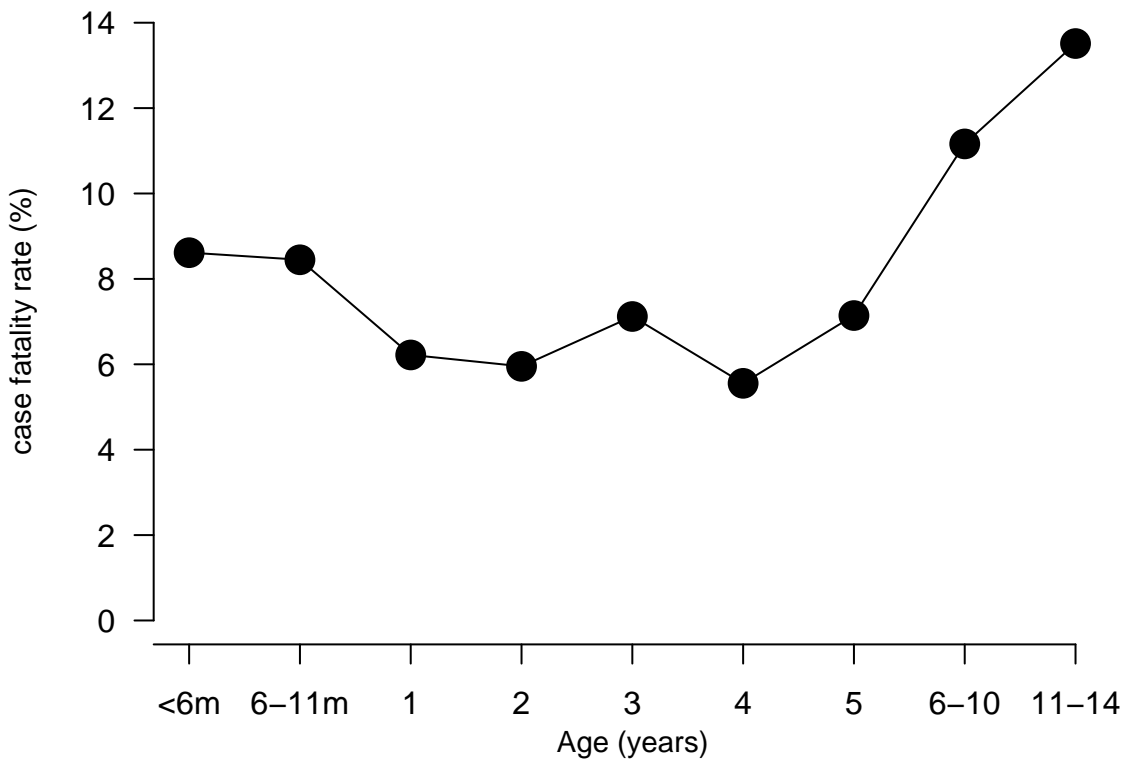

Supplement: MOESM2 [file 9547356]
